# Supplementary material for: Remodeling of Lipid A in Pseudomonas syringae pv. phaseolicola In Vitro
Source: Int J Mol Sci. 2022 Feb 11;23(4):1996. doi: 10.3390/ijms23041996 (PMC8876380; doi:10.3390/ijms23041996)
Supplement: Supplementary file 1 [file ijms-23-01996-s001.zip › ijms-1557874-supplementary.pdf]

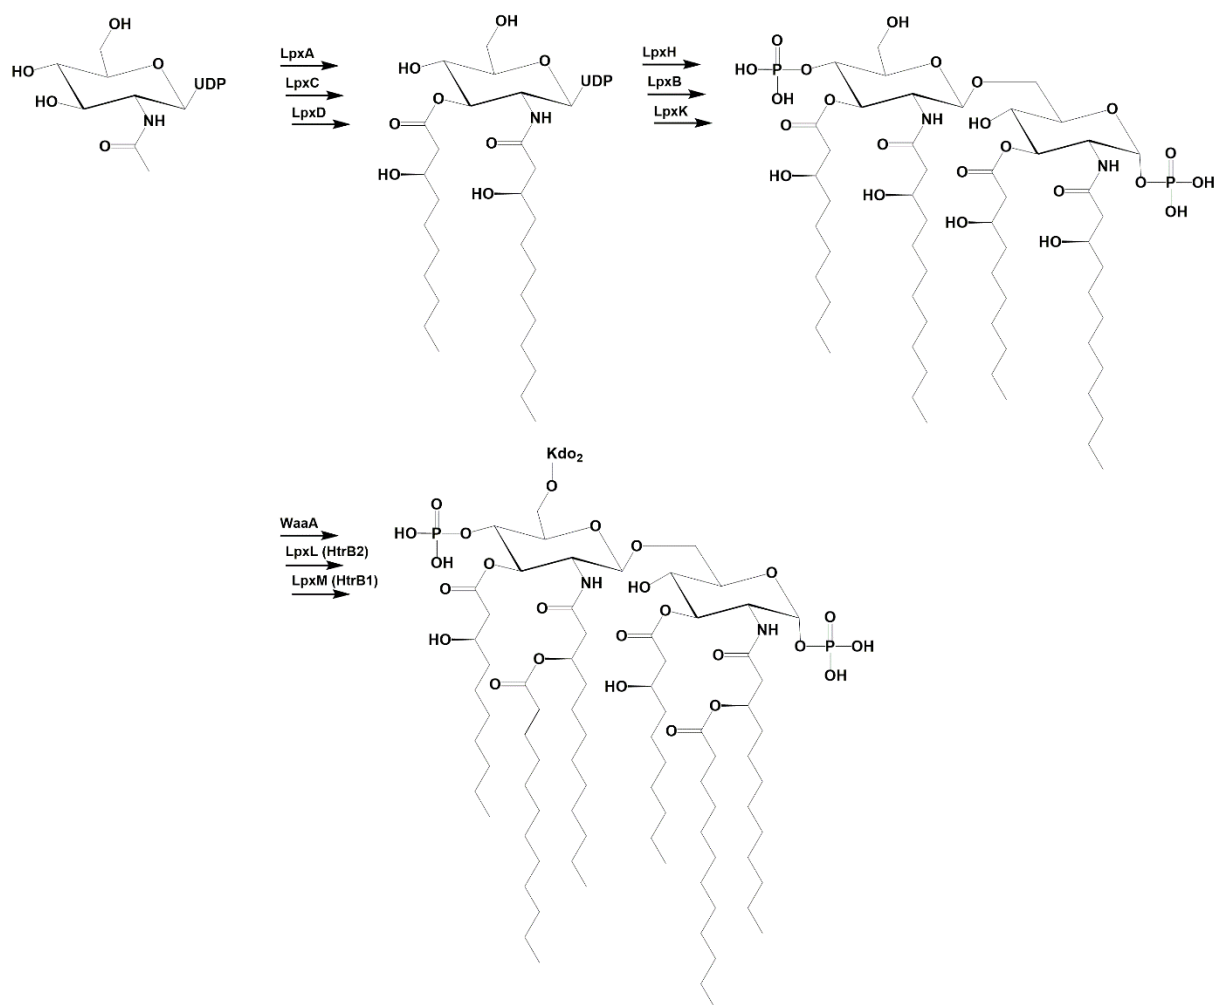

**Figure S1.** Lipid A biosynthesis in *Pseudomonas aeruginosa*. The UDP-GlcNAc 3-O-acyltransferase LpxA catalyzes the addition of a 3-OH-C10:0 to the uridine diphosphate N-acetylglucosamine (UDP-D-GlcNAc). Next, LpxC deacetylates the UDP-D-GlcNAc, followed by the addition of a 3-OH-C12:0 catalyzed by the 3-O-acyl-GlcN 2-N-acyltransferase LpxD. The UDP-diacyl-GlcN pyrophosphatase LpxH forms a mono-phosphorylated GlcN. LpxB, a disaccharide synthase, catalyzes the condensation of the mono-phosphorylated GlcN and a UDP-2,3-diacyl-GlcN. LpxK phosphorylates the 4'-position of the resulting tetraacyl-β-(1→6)-di-GlcN monophosphate. WaaA catalyzes the addition of 3-deoxy-D-manno-oct-2-ulosonic acid (Kdo) moieties to the distal GlcN. The secondary lauroyl 2-hydroxylases LpxL (HtrB2) and LpxM (HtrB1) catalyze the addition of C12:0 chains to the amide-linked primary 3-OH-C12:0 acyl chains.

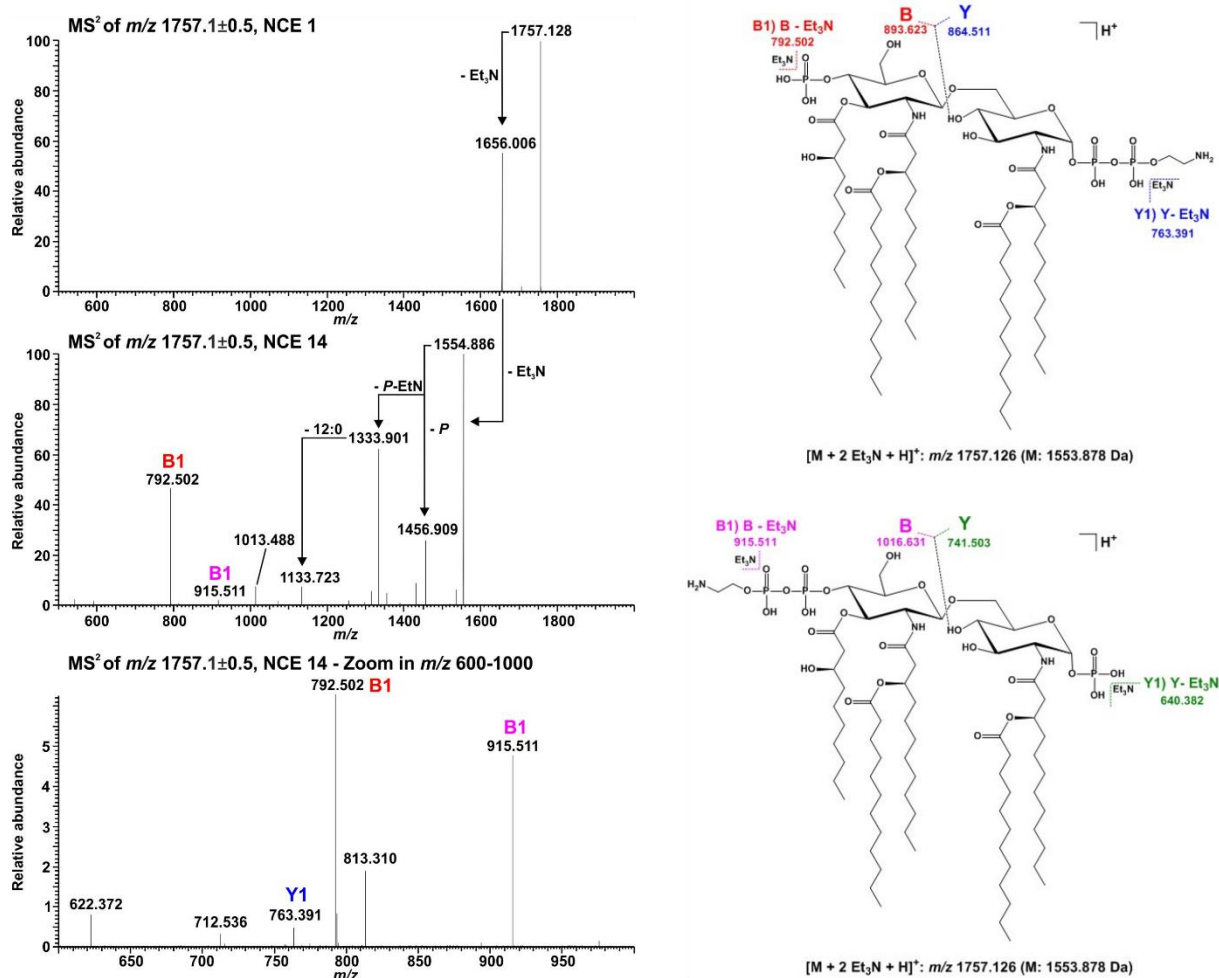

**Figure S2.** MS<sup>2</sup> analysis of the penta-acylated, di-phosphorylated and mono-*P*-EtN substituted lipid A species with a monoisotopic neutral mass of 1553.878 Da, analogously performed as experiments shown in Figures 5 and 6. The formed di-Et<sub>3</sub>N adduct has been selected for the MS<sup>2</sup> experiment ( $m/z$  1757.128; top panel). Since both the 1-*P* as well as the 4'-*P* can potentially be *P*-EtN modified both possible structures, including respective putative fragment masses, are depicted on the right side. Notably, the presence of *P*-EtN changes the fragmentation behaviour in such a way that only fragments without Et<sub>3</sub>N addition are observable. Both possible B-fragment ions can be found in the spectrum recorded with an NCE of 14, with the one of the lipid A carrying the *P*-EtN on the 1-*P* ( $m/z$  792.502; **B1**) being much more prominent than the one of the lipid A carrying the *P*-EtN on the 4'-*P* ( $m/z$  915.511; **B1**) (middle panel). For the first species, the corresponding Y-fragment without Et<sub>3</sub>N addition (**Y1**;  $m/z$  763.391) can be observed in a very tiny proportion when zooming into the spectrum (bottom panel), whereas the **Y1** (calc.  $m/z$  640.382) is not observable, most likely due to the much lower abundance of this lipid A variant.

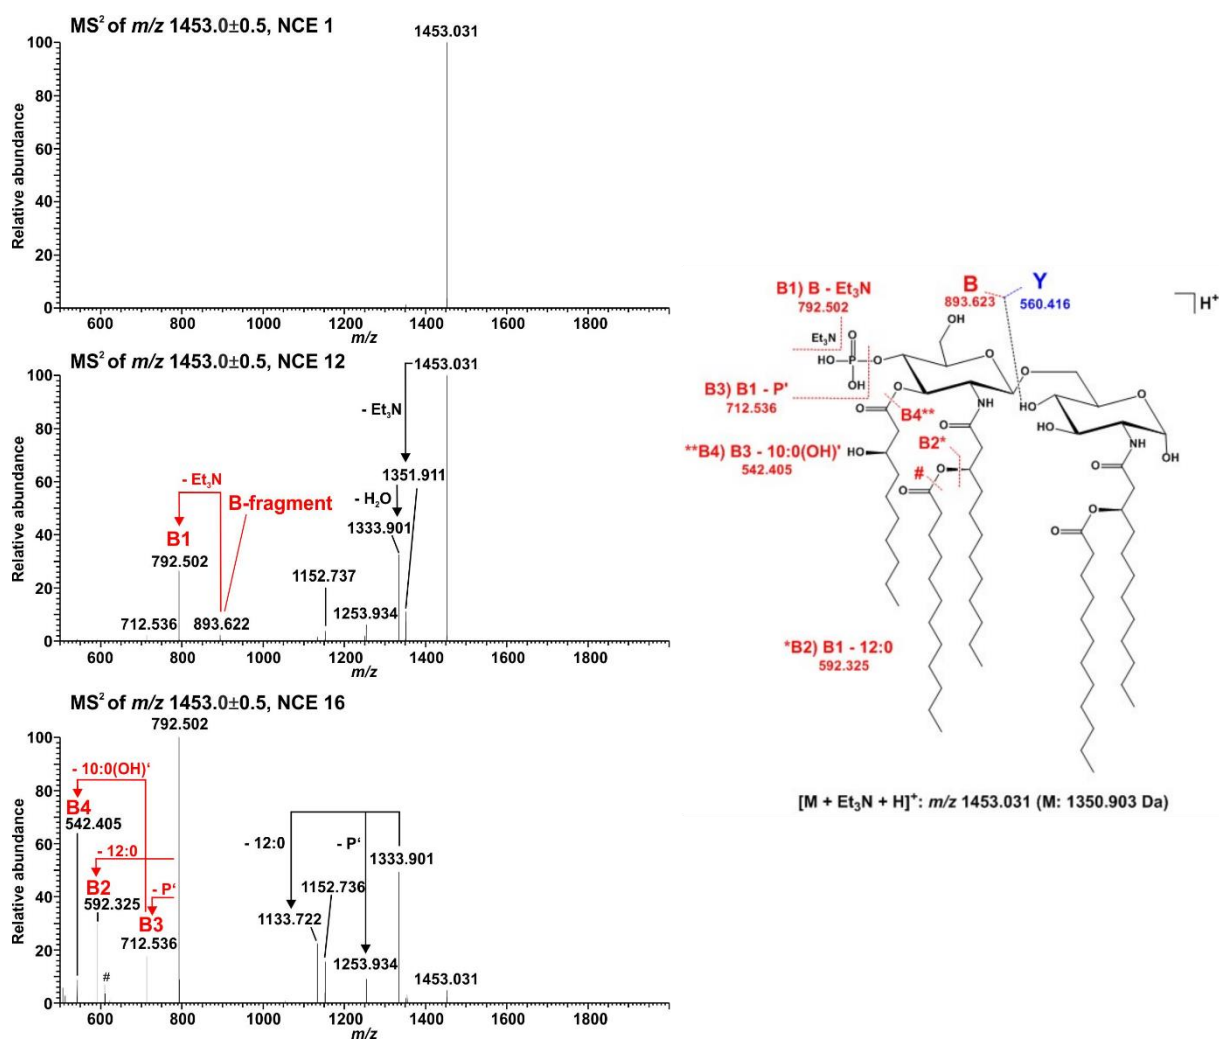

**Figure S3.** MS<sup>2</sup> analysis of the penta-acylated, mono-phosphorylated lipid A species with an monoisotopic neutral mass of 1350.903 Da, analogously performed as experiments shown in Figures 5 and 6. Due to the presence of only one phosphate moiety, only a mono-Et<sub>3</sub>N adduct is formed, which has been selected for the MS<sup>2</sup> experiment ( $m/z$  1453.031; top panel). The same B-fragment ( $m/z$  893.622 (with Et<sub>3</sub>N) and  $m/z$  792.502 (without Et<sub>3</sub>N)) as observed in the fragmentations of the other lipid A species (Figures 5 and 6) can be observed (middle panel). Here, no corresponding Y-fragment ion can be detected, most likely due to the absence of a charge-stabilizing functional group. Nonetheless, the B-fragment and its further fragmentation (bottom panel) is indicative for the fact that the mono-phosphorylated lipid A lacks the 1-*P*.

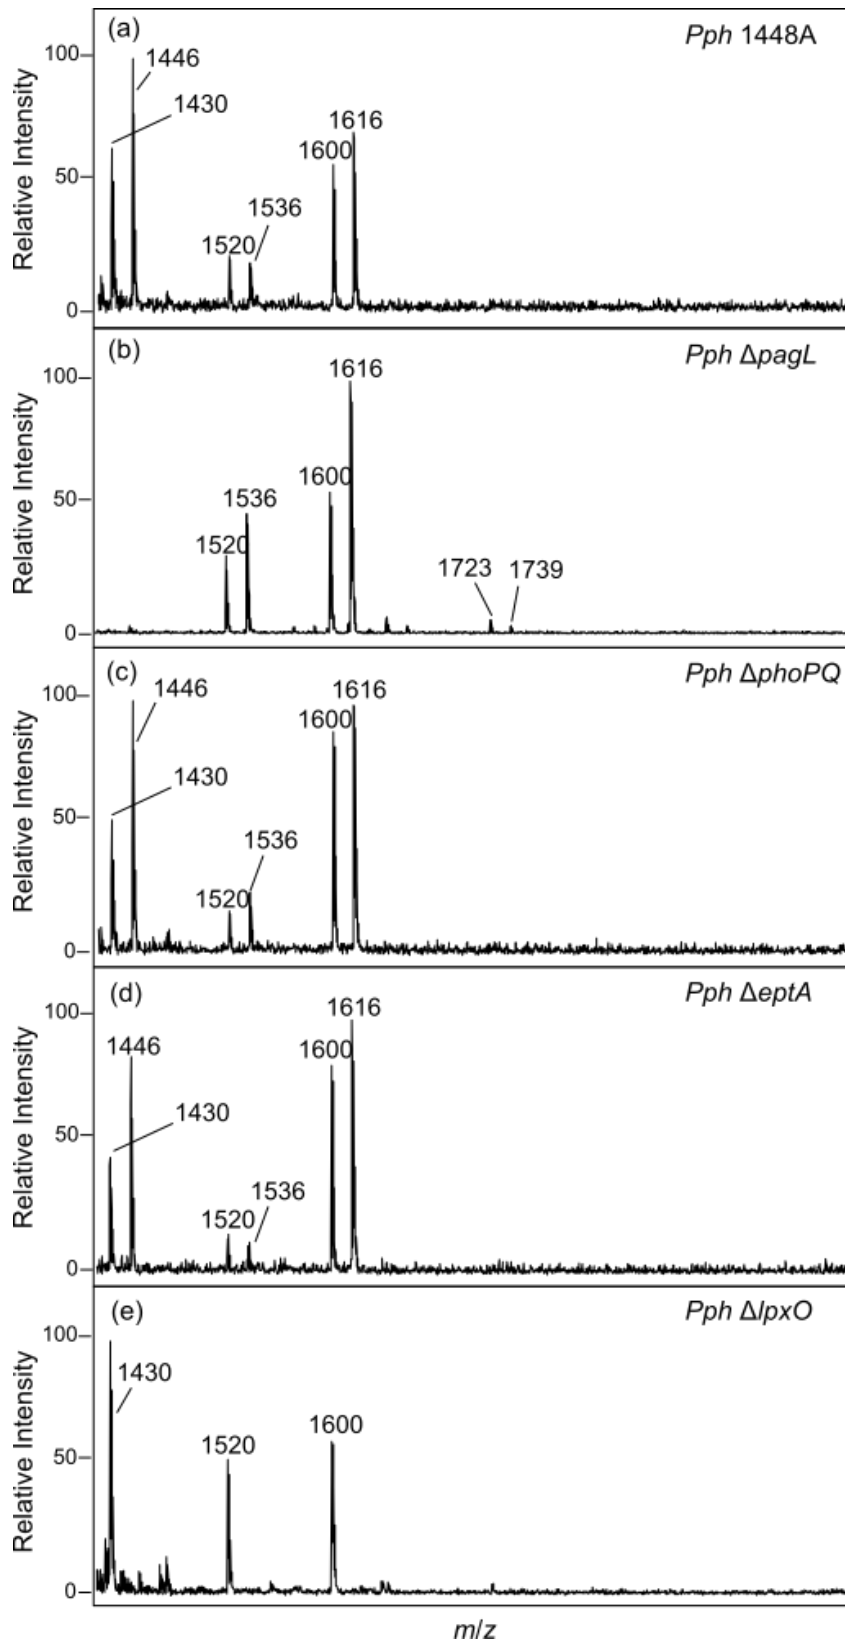

**Figure S4.** Mass spectrometric analysis of crude lipid A preparations generated from *Pph* 1448A WT and mutant strains via MALDI-TOF. *P*-EtN modifications are underrepresented using this methodology, so only the structural alterations in the  $\Delta pagL$  and  $\Delta lpxO$  mutant can be substantiated.

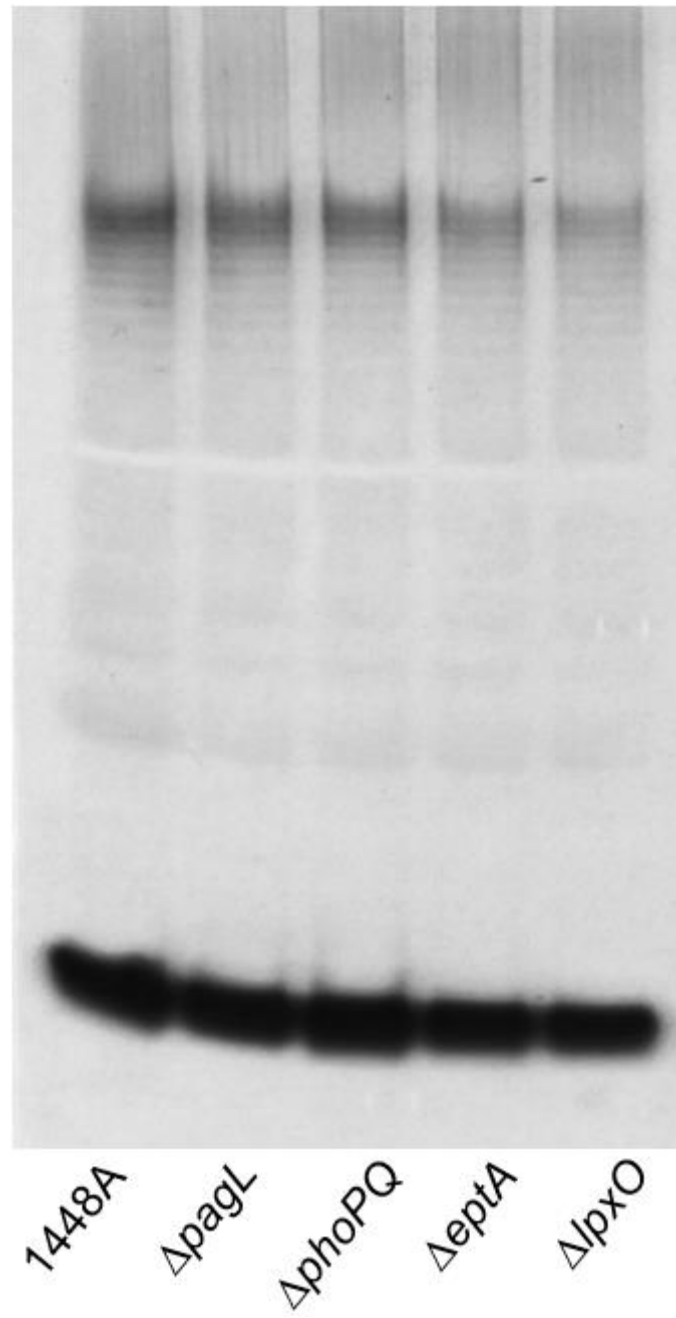

**Figure S5.** Bis-Tris SDS-PAGE of crude LPS fractions from *Pph* 1448A WT and the indicated mutant strains. OPS with similar banding patterns to the WT could be detected in every strain.

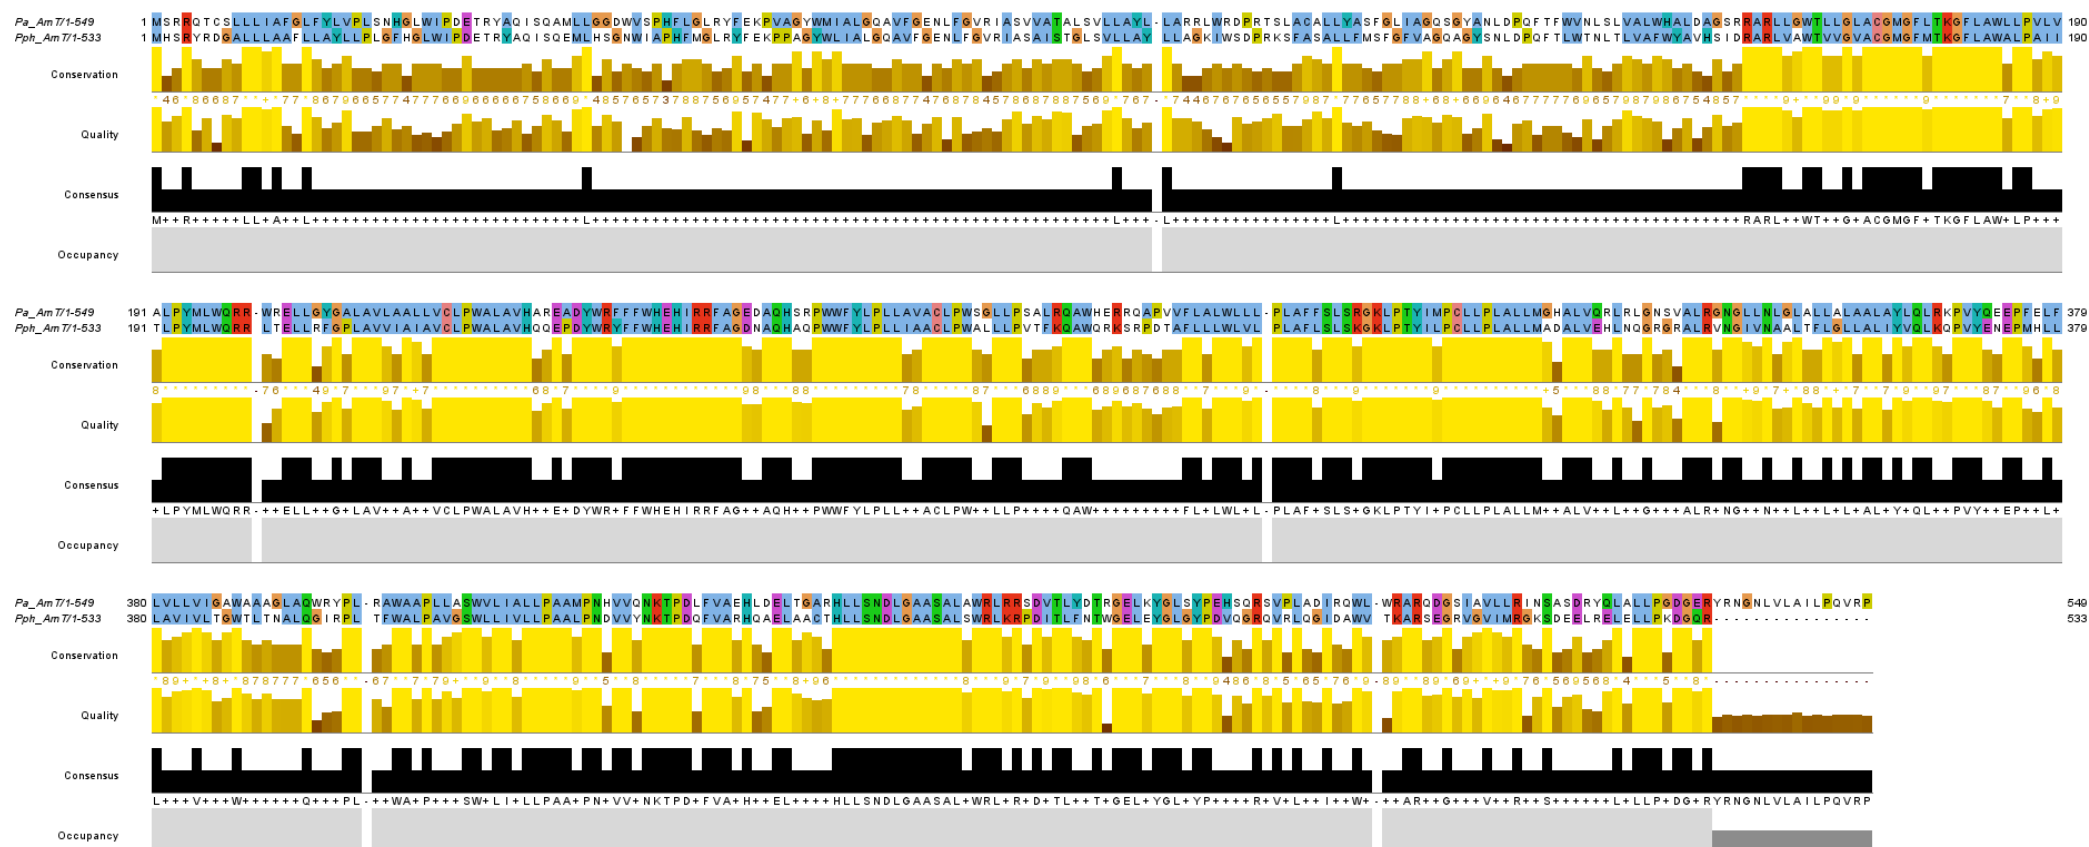

**Figure S6.** Amino acid sequence alignment of ArnT of *P. aeruginosa* PAO1 and *Pph* 1448A. Sequences were aligned using Jalview with Clustalx as color coding. The sequence of *P. aeruginosa* PAO1 ArnT exceeds *Pph* 1448A ArnT by 16 amino acids.

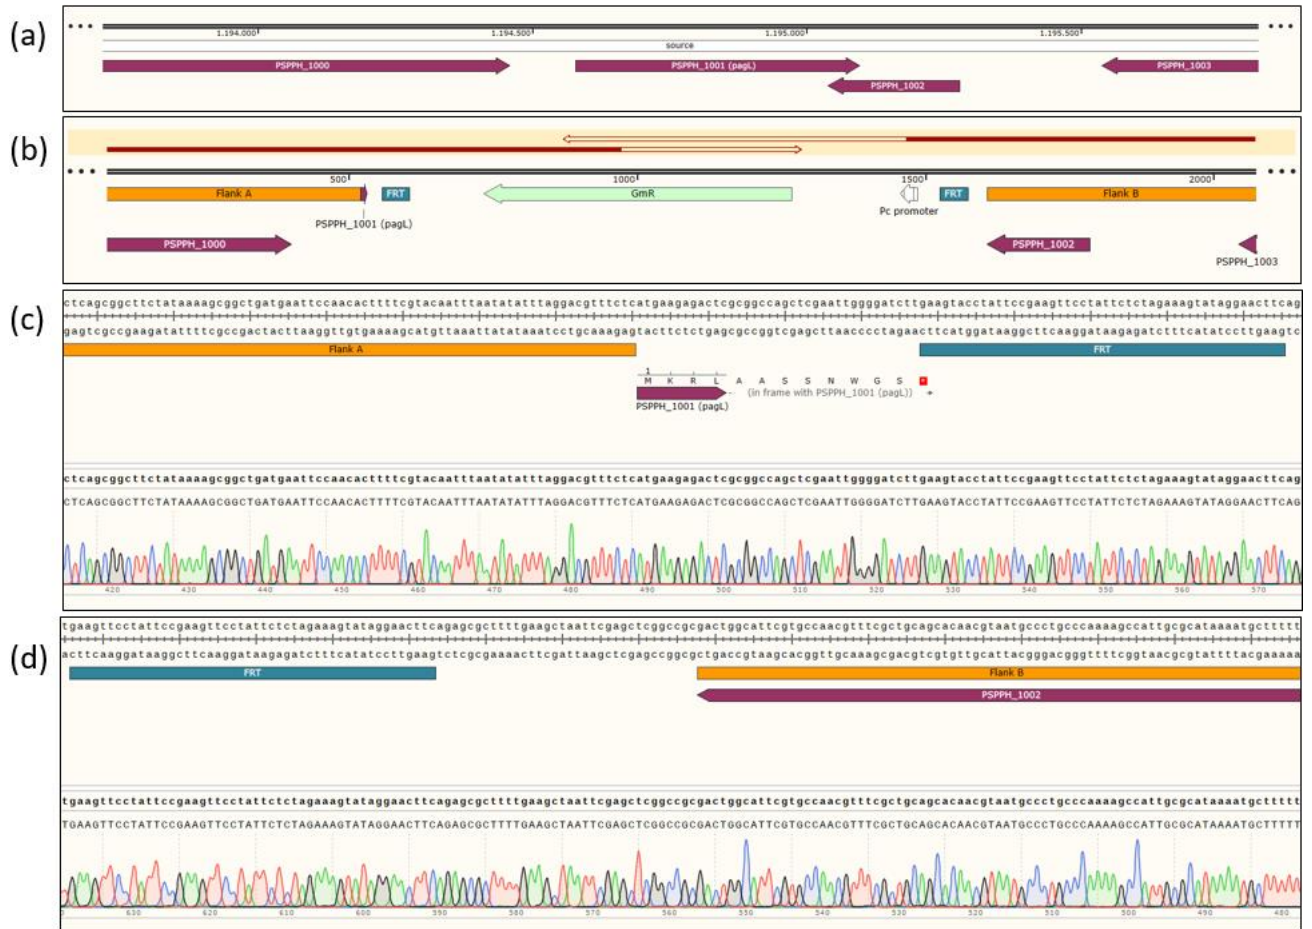

**Figure S7.** Verification of the *pagL* knockout and gentamicin knock-in in the *Pph* 1448A genome by Sanger sequencing. (a) Genetic map showing *Pph* 1448A WT *pagL* (PSPPH\_1001) and neighboring genes. Notably, the open reading frames of PSPPH\_1001 and PSPPH\_1002 overlap. PSPPH\_1002 was computationally predicted and no gene function was predicted or shown. (b) Modified *Pph* 1448A genome with a gentamicin (Gm<sup>R</sup>) knock-in replacing the putative *Pph* 1448A *pagL*. Red arrows indicate sequencing coverage to verify the gentamicin knock-in and the *pagL* knockout, respectively. FRT sequences flanking the gentamicin cassette can be used for site-directed recombination. (c, d) Transition region of the flanking regions A (c) and B (d) to the gentamicin selection marker. Sequencing chromatograms matching the knock-in are shown below the predicted sequence. The residual PagL sequence in combination with the introduced fragment results in a premature stop codon.

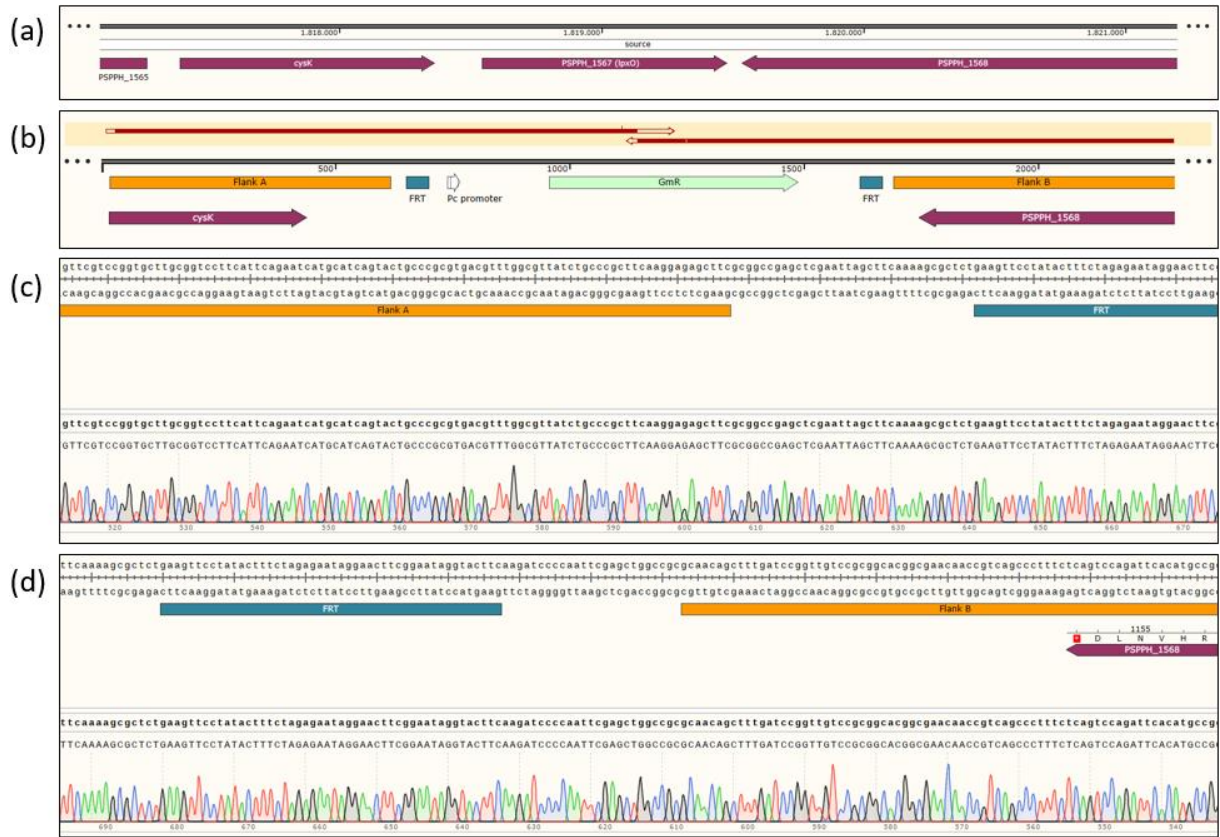

**Figure S8.** Verification of the *lpxO* knockout and gentamicin knock-in in the *Pph* 1448A genome by Sanger sequencing. (a) Genetic map showing *Pph* 1448A WT *lpxO* (PSPPH\_1567) and neighboring genes. (b) Modified *Pph* 1448A genome with a gentamicin (Gm<sup>R</sup>) knock-in replacing the putative *Pph* 1448A *lpxO*. Red arrows indicate sequencing coverage to verify the gentamicin knock-in and the *lpxO* knockout, respectively. FRT sequences flanking the gentamicin cassette can be used for site-directed recombination. (c, d) Transition region of the flanking regions A (c) and B (d) to the gentamicin selection marker. Sequencing chromatograms matching the knock-in are shown below the predicted sequence.

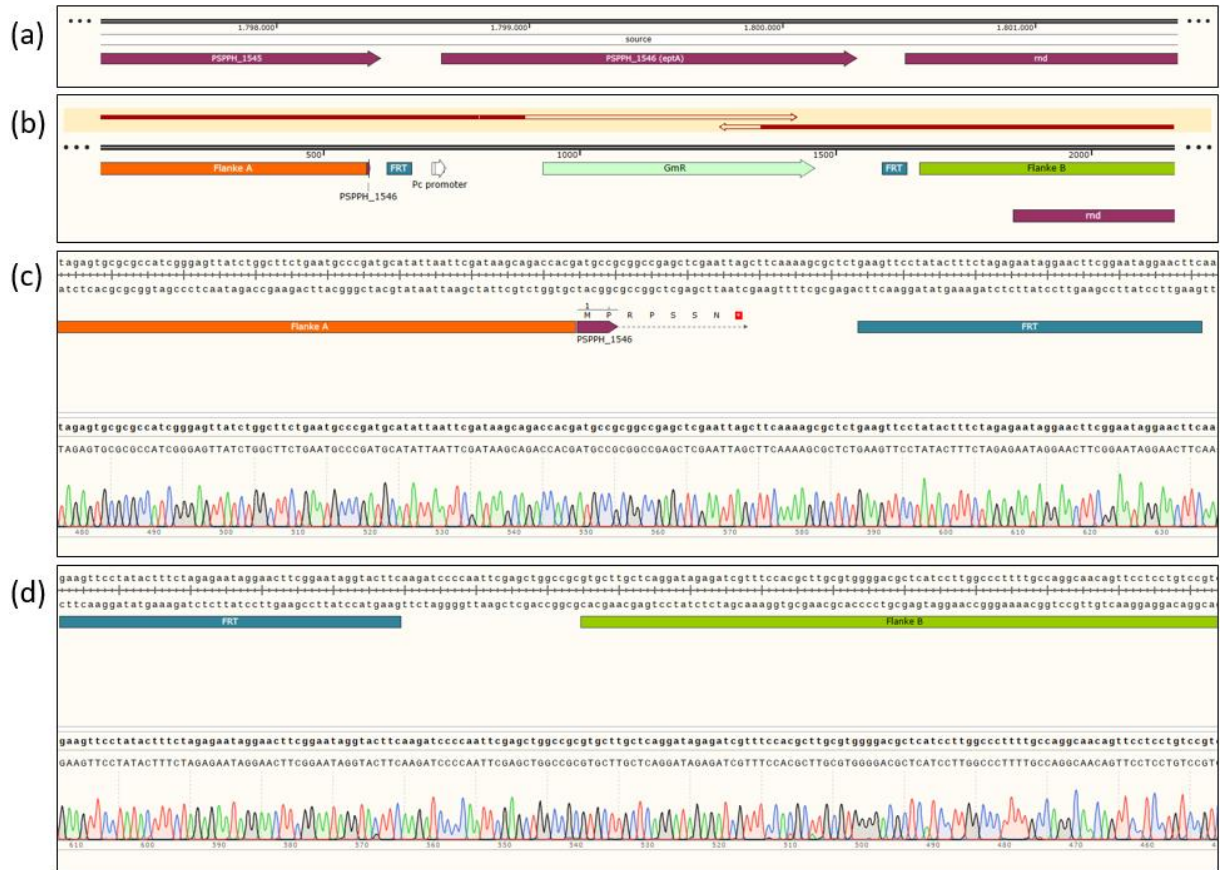

**Figure S9.** Verification of the *eptA* knockout and gentamicin knock-in in the *Pph* 1448A genome by Sanger sequencing. (a) Genetic map showing *Pph* 1448A WT *eptA* (PSPPH\_1546) and neighboring genes. (b) Modified *Pph* 1448A genome with a gentamicin (*Gm<sup>R</sup>*) knock-in replacing the putative *Pph* 1448A *eptA*. Red arrows indicate sequencing coverage to verify the gentamicin knock-in and the *eptA* knockout, respectively. FRT sequences flanking the gentamicin cassette can be used for site-directed recombination. (c, d) Transition region of the flanking regions A (c) and B (d) to the gentamicin selection marker. Sequencing chromatograms matching the knock-in are shown below the predicted sequence. The residual *EptA* sequence in combination with the introduced results in a premature stop codon.

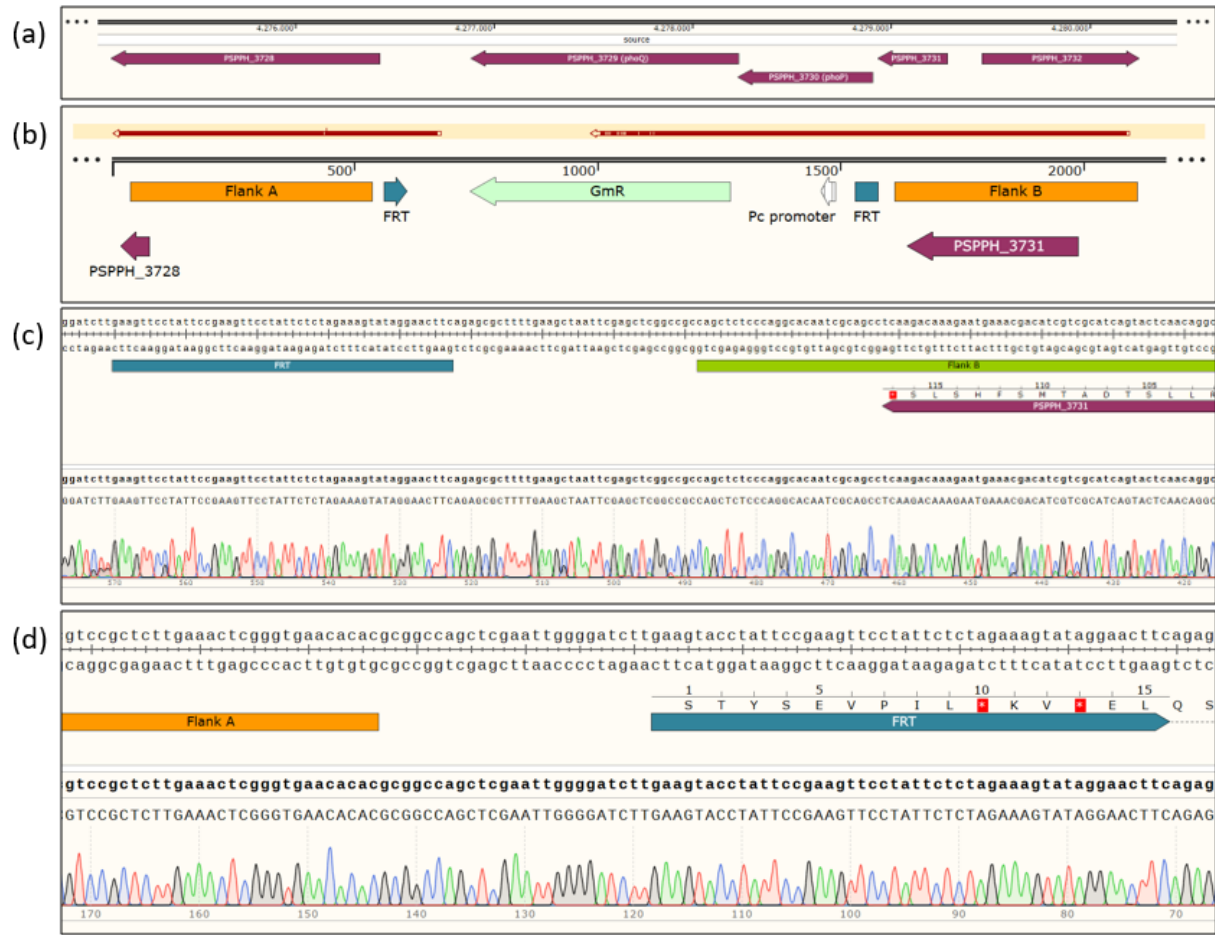

**Figure S10.** Verification of the *phoP/phoQ* knockout and gentamicin knock-in in the *Pph* 1448A genome by Sanger sequencing. (a) Genetic map showing *Pph* 1448A WT *phoP* (PSPPH\_3730) and *phoQ* (PSPPH\_3729), as well as neighboring genes. (b) Modified *Pph* 1448A genome with a gentamicin (Gm<sup>R</sup>) knock-in replacing the putative *Pph* 1448A *phoP* and *phoQ*. Red arrows indicate sequencing coverage to verify the gentamicin knock-in and the *phoP/phoQ* knockout, respectively. FRT sequences flanking the gentamicin cassette can be used for site-directed recombination. (c, d) Transition region of the flanking regions A (c) and B (d) to the gentamicin selection marker. Sequencing chromatograms matching the knock-in are shown below the predicted sequence.

**Table S1.** Analysis of predicted proteomes for sequence identity (in %) with proteins involved in lipid A biosynthesis, modification, or regulation. *P. aeruginosa* PAO1 was used as reference.

| Gene locus (encoded<br>proteine) of <i>P.<br/>aeruginosa</i> PAO1 | <i>P. syringae</i> pv.<br><i>actinidiae</i><br>KW41 | <i>P. syringae</i> pv.<br><i>maculicola</i> ES4326 | <i>P. syringae</i> pv.<br><i>phaseolicola</i><br>1448A | <i>P. syringae</i> pv.<br><i>syringae</i> B728a | <i>P. syringae</i> pv.<br><i>tomato</i> DC3000 | <i>P. syringae</i> pv.<br><i>tomato</i> T1 | <i>P. cichorii</i><br>JBC1 | <i>P. fluorescens</i><br>A506 | <i>P. fluorescens</i><br>FR1 | <i>P. fluorescens</i><br>Pf0-1 | <i>P. fuscovaginae</i><br>SE-1 | <i>P. putida</i><br>KT2440 | <i>P. savastanoi</i> pv.<br><i>savastanoi</i> NCPPB 3335 | <i>P. viridiflava</i><br>UASWS0038 | <i>P. aeruginosa</i><br>PA14 |
|-------------------------------------------------------------------|-----------------------------------------------------|----------------------------------------------------|--------------------------------------------------------|-------------------------------------------------|------------------------------------------------|--------------------------------------------|----------------------------|-------------------------------|------------------------------|--------------------------------|--------------------------------|----------------------------|----------------------------------------------------------|------------------------------------|------------------------------|
| PA3644 (LpxA)                                                     | 88.0                                                | 88.4                                               | 87.6 (PSPPH_3828)                                      | 88.0                                            | 87.6                                           | 87.6                                       | 87.2                       | 90.7                          | 91.5                         | 90.7                           | 90.3                           | 86.4                       | 88.0                                                     | 87.6                               | 100.0                        |
| PA4406 (LpxC)                                                     | 90.4                                                | 90.4                                               | 91.1 (PSPPH_4102)                                      | 91.1                                            | 90.4                                           | 90.4                                       | 90.1                       | 91.4                          | 91.4                         | 91.7                           | 92.1                           | 91.7                       | 91.1                                                     | 90.8                               | 99.7                         |
| PA3646 (LpxD)                                                     | 75.6                                                | 76.5                                               | 74.5 (PSPPH_3830)                                      | 75.4                                            | 76.2                                           | 76.2                                       | 79.8                       | 77.7                          | 80.2                         | 79.9                           | 79.4                           | 80.2                       | 75.1                                                     | 78.4                               | 99.4                         |
| PA1792 (LpxH)                                                     | 74.6                                                | 73.7                                               | 72.9 (PSPPH_1676)                                      | 72.9                                            | 74.6                                           | 73.3                                       | 72.5                       | 73.7                          | 72.9                         | 75.0                           | 76.5                           | 73.3                       | 72.9                                                     | 72.0                               | 100.0                        |
| PA3643 (LpxB)                                                     | 79.2                                                | 77.2                                               | 77.3 (PSPPH_3827)                                      | 76.9                                            | 79.2                                           | 79.5                                       | 78.1                       | 79.0                          | 76.9                         | 77.4                           | 79.1                           | 80.2                       | 77.1                                                     | 76.8                               | 99.7                         |
| PA2981 (LpxK)                                                     | 75.4                                                | 76.3                                               | 77.2 (PSPPH_1628)                                      | 76.6                                            | 75.4                                           | 75.4                                       | 75.5                       | 75.2                          | 73.9                         | 74.8                           | 78.4                           | 73.8                       | 77.2                                                     | 75.1                               | 100.0                        |
| PA3242 (LpxL/HtrB2)                                               | 78.4                                                | 80.0                                               | 80.3 (PSPPH_1607)                                      | 79.4                                            | 78.7                                           | 78.7                                       | 76.1                       | 80.4                          | 79.9                         | 80.3                           | 79.4                           | 78.8                       | 80.3                                                     | 78.7                               | 99.4                         |
| PA0011 (LpxM/HtrB1)                                               | 80.0                                                | 79.3                                               | 79.0 (PSPPH_0014)                                      | 79.0                                            | 79.3                                           | 79.3                                       | 79.0                       | 76.9                          | 76.3                         | 75.6                           | 77.6                           | 73.9                       | 79.0                                                     | 80.0                               | 100.0                        |
| PA4661 (PagL)                                                     | 60.7                                                | 67.7                                               | 59.5 (PSPPH_1001)                                      | 60.1                                            | 64.0                                           | 60.7                                       | 61.3                       | 61.3                          | 59.5                         | 60.7                           | 60.1                           | 67.6                       | 60.1                                                     | 61.9                               | 100.0                        |
| PA4512 (LpxO1)                                                    | 55.1                                                | 51.7                                               | 54.0 (PSPPH_1567)                                      | 54.7                                            | 55.1                                           | 55.1                                       | 55.4                       | 71.8                          | 72.9                         | 71.6                           | 71.9                           | 69.4                       | 54.0                                                     | 55.1                               | 99.3                         |
| PA0936 (LpxO2)                                                    | 73.4                                                | 73.4                                               | 73.4 (PSPPH_1567)                                      | 73.7                                            | 73.4                                           | 73.4                                       | 71.2                       | 75.3                          | 74.3                         | 75.0                           | 75.0                           | 76.5                       | 73.4                                                     | 73.4                               | 99.7                         |
| PA1972 (EptA)                                                     | 63.6                                                | 61.9                                               | 63.5 (PSPPH_1546)                                      | 63.5                                            | 63.5                                           | 63.5                                       | 63.9                       | 28.1                          | 65.9                         | 63.2                           | 29.3                           | 61.2                       | 63.6                                                     | 62.7                               | 99.6                         |
| PA3556 (ArnT)                                                     | 63.1                                                | 60.6                                               | 63.1 (PSPPH_2806)                                      | 62.5                                            | 25.5                                           | —                                          | —                          | 62.3                          | 27.4                         | 62.2                           | 61.5                           | 26.7                       | 62.1                                                     | 61.3                               | 99.1                         |
| PA1343 (PagP)                                                     | —                                                   | —                                                  | —                                                      | —                                               | —                                              | —                                          | —                          | 65.1                          | —                            | —                              | 67.8                           | —                          | —                                                        | —                                  | 98.7                         |
| PA1179 (PhoP)                                                     | 83.5                                                | 83.0                                               | 83.5 (PSPPH_3730)                                      | 83.5                                            | 83.5                                           | 83.5                                       | 85.7                       | 84.4                          | 85.8                         | 84.8                           | 83.6                           | 86.7                       | 83.5                                                     | 84.4                               | 100.0                        |
| PA1180 (PhoQ)                                                     | 65.5                                                | 67.9                                               | 65.2 (PSPPH_3729)                                      | 65.2                                            | 65.4                                           | 65.4                                       | 65.6                       | 67.2                          | 68.1                         | 66.7                           | 67.3                           | 67.4                       | 64.9                                                     | 64.3                               | 100.0                        |
| PA4776 (PmrA)                                                     | 57.5                                                | 57.9                                               | 57.5 (PSPPH_3453)                                      | 57.9                                            | 57.0                                           | 57.5                                       | 55.6                       | 54.2                          | 55.5                         | 55.5                           | 55.1                           | 56.8                       | 57.5                                                     | 53.2                               | 100.0                        |
| PA4777 (PmrB)                                                     | 30.9                                                | 32.8                                               | 31.8 (PSPPH_3454)                                      | 31.1                                            | 31.5                                           | 31.5                                       | 32.0                       | 37.8                          | 27.2                         | 27.6                           | 37.8                           | 35.8                       | 31.6                                                     | 32.4                               | 99.0                         |

**Table S2.** Strains used in this study.

| Strain                           | Abbreviation   | Source / reference      |
|----------------------------------|----------------|-------------------------|
| <i>Pseudomonas syringae</i>      |                |                         |
| <i>Pph</i> 1448A (race 6)        | WT or 1448A    | [57]                    |
| <i>Pph pagL::Gm<sup>R</sup></i>  | $\Delta pagL$  | generated in this study |
| <i>Pph phoPQ::Gm<sup>R</sup></i> | $\Delta phoPQ$ | generated in this study |
| <i>Pph lpxO::Gm<sup>R</sup></i>  | $\Delta lpxO$  | generated in this study |
| <i>Pph eptA::Gm<sup>R</sup></i>  | $\Delta eptA$  | generated in this study |
| <i>Escherichia coli</i>          |                |                         |
| <i>E. coli</i> DH5 $\alpha$      | DH5 $\alpha$   | [61]                    |
| <i>E. coli</i> HB101             | HB101          | [63]                    |

**Table S3.** Oligonucleotides used in this study.

| Purpose                                                                           | Name            | Sequence (5' → 3')                     |
|-----------------------------------------------------------------------------------|-----------------|----------------------------------------|
| Sequencing of pGGKO plasmid                                                       | seqPGGKO-f      | agcgccaataacgcaaac                     |
|                                                                                   | seqPGGKO-r      | cagtagctgacattcatc                     |
| GmR insertion into pGGKO                                                          | ggGmR-f         | tgaagacttggccagctcgaattggggatcttg      |
|                                                                                   | ggGmR-r         | tgaagacttggccgagctcgaattagcttcaaaagc   |
| Knockout (KO) verification                                                        | Vf_fIA          | gttaccaccgctgcgttcggtc                 |
|                                                                                   | Vf_fIB          | gttaccaccgctgcgttcggtc                 |
| <i>pagL</i> KO flanking sequences;<br>cloning primer for insertion into<br>pGGKO  | pph-pagL-fIA-f  | ttgaagactgtcagttcggttagtgaccag         |
|                                                                                   | pph-pagL-fIA-r  | ttgaagacgcggccgcgagctcttcatgagaacgtcc  |
|                                                                                   | pph-pagL-fIB-f  | ttgaagacgcggccgcgactggcattcggtccaac    |
|                                                                                   | pph-pagL-fIB-r  | ttgaagacgtctaggaacgcaaagggattgcgac     |
| <i>pagL</i> KO verification                                                       | vf-pph-pagL-f   | gttgctggaccgatttgcc                    |
|                                                                                   | vf-pph-pagL-r   | cgctgatctgccgtgagttc                   |
| <i>lpxO</i> KO flanking sequences;<br>cloning primer for insertion into<br>pGGKO  | pph-lpxO-fIA-f  | ttgaagactgtcagccggtatttcccgtatatcaag   |
|                                                                                   | pph-lpxO-fIA-r  | ttgaagacgcggccgcgaagctctcttgaagcggg    |
|                                                                                   | pph-lpxO-fIB-f  | tttgaagacgcggccgcgaacagcttgatccggttg   |
|                                                                                   | pph-lpxO-fIB-r  | tttgaagacgtctaggactcacgcagcgaaggg      |
| <i>lpxO</i> KO verification                                                       | vf-pph-lpxO-f   | gtactggtggcaggcgtcg                    |
|                                                                                   | vf-pph-lpxO-r   | caaacgcctcgacagccac                    |
| <i>phoPQ</i> KO flanking sequences;<br>cloning primer for insertion into<br>pGGKO | pph-phoPQ-fIA-f | ttgaagactgtcgagacaatcgcaacgattacctg    |
|                                                                                   | pph-phoPQ-fIA-r | ttgaagacgcggccgcgtgtgttaccgagtttcaag   |
|                                                                                   | pph-phoPQ-fIB-f | ttgaagacgcggccgcagctctcccaggcacaatcg   |
|                                                                                   | pph-phoPQ-fIB-r | ttgaagacgtctaggctgcatccggttagatgac     |
| <i>phoPQ</i> KO verification                                                      | Vf_GmR_rv       | ggccgcggagttgttcgg                     |
|                                                                                   | vf-pph-phoPQ-rv | cgcaaacaaccatagccgattc                 |
| <i>eptA</i> KO flanking sequences;<br>cloning primer for insertion into<br>pGGKO  | pph-eptA-fIA-f  | tttgaagactgtcgagcacatcgctcagtgaac      |
|                                                                                   | pph-eptA-fIA-r  | tttgaagacgcggccgcggcatcgtggtctgcttatcg |
|                                                                                   | pph-eptA-fIB-f  | tttgaagacgcggccgcgtgctcaggatagagatcg   |
|                                                                                   | pph-eptA-fIB-r  | tttgaagacgtctagcagacgcgaatagcccatgg    |
| <i>eptA</i> KO verification                                                       | vf-pph-eptA-fw  | cgccggtggagatcaacgg                    |
|                                                                                   | vf-pph-eptA-rv  | gtcgatgttgaggacctctctgc                |
